# Supplementary material for: Optical microring resonator based corrosion sensing
Source: Royal Society of Chemistry journal article supplement (doi:10.1039/c6ra11538a), 2016-01-01
Supplement: c6ra11538a1.pdf [file c6ra11538a1.pdf]

## Supporting information

# Optical Microring Resonator Based Corrosion Sensing

Rajib Ahmed<sup>1</sup>, Ahmmed A. Rifat,<sup>2</sup> Ali K. Yetisen,<sup>3</sup> Michel Saab Salem<sup>1</sup>, Seok-Hyun Yun,<sup>3,4</sup> and Haider Butt<sup>1,\*</sup>

<sup>1</sup>Nanotechnology Laboratory, School of Engineering, University of Birmingham, Birmingham B15 2TT, UK.

<sup>2</sup>Integrated Lightwave Research Group, Dept. of Electrical Engineering, Faculty of Engineering, University of Malaya, Kuala Lumpur-50603, Malaysia.

<sup>3</sup>Harvard Medical School and Wellman Center for Photomedicine, Massachusetts General Hospital, 65 Landsdowne Street, Cambridge, MA, 02139, USA

<sup>4</sup>Harvard-MIT Division of Health Sciences and Technology, Massachusetts Institute of Technology, Cambridge, MA, 02139, USA

\*Email: [h.butt@bham.ac.uk](mailto:h.butt@bham.ac.uk). Tel.: +441214158623

## Coupled Mode Theory

The transmission characteristic of the waveguide is based on the couple mode theory (CMT). The light propagation through the waveguide and the interaction between the co-propagating light are important to understand the basic principle of different waveguide based devices like micro ring resonator, mach-zender interferometer (MZI) etc.

Two propagating modes in the waveguide can be coupled or interference phenomena can occur due to close proximity. Perturbation theory can be used to analysis the light propagation in the coupled waveguide. Condition is to maintain the same EM-field distribution before and after the coupling. The aim of this section is to give the basic mathematics related to the coupled mode theory for the waveguide structure in the co-directional coupler. The coupling mechanism and power transfer between waveguides for the co-directional coupler are discussed [1].

Consider two waveguides, refractive index  $n_1$  and  $n_2$  with enough distance that each waveguide is effected by other and coupled power to another (Figure S1).

The directional coupler before coupling can support eigen modes,  $\mathbf{E}_p$  and  $\mathbf{H}_p$  ( $p=1, 2$ ) which satisfies the following Maxwell's equations [1]:

$$\nabla \times \mathbf{E}_p = -j\omega\mu_0 \mathbf{H}_p \quad (\text{S.1})$$

$$\nabla \times \mathbf{H}_p = j\omega\epsilon_0 N_p^2 \mathbf{E}_p \quad (\text{S.2})$$

Here,  $N_p^2 =$  Refractive index distributions of the waveguides.

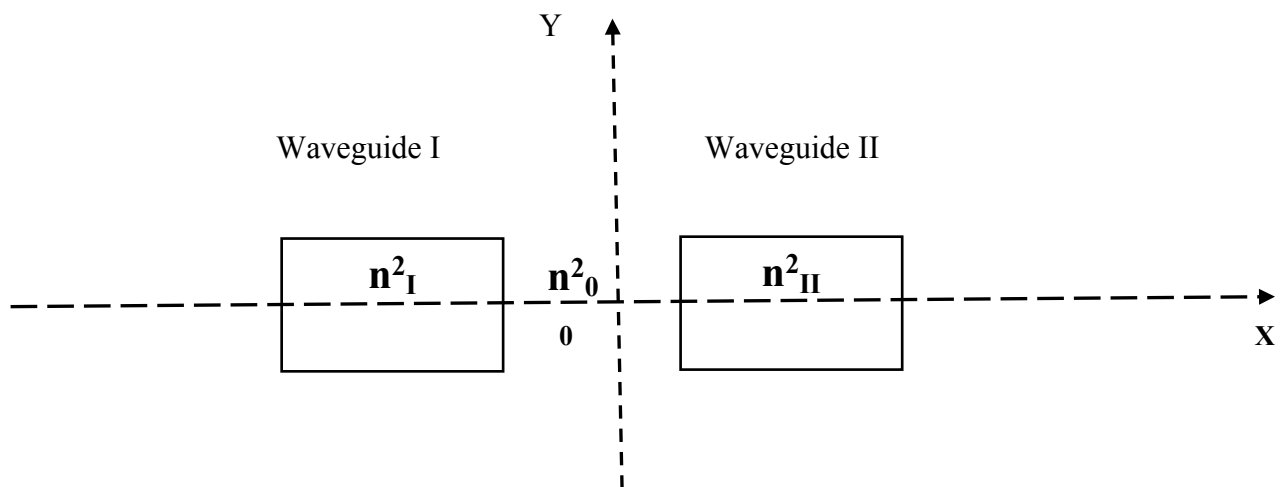

Figure S1: Directional coupler

The coupled EM fields can be considered as sum of eigen modes of the each waveguide:

$$\mathbf{E} = A(z) \mathbf{E}_1 + B(z) \mathbf{E}_2 \quad (\text{S.3})$$

$$\mathbf{H} = A(z) \mathbf{H}_1 + B(z) \mathbf{H}_2 \quad (\text{S.4})$$

The coupled EM fields also satisfies the Maxwell's equations like before coupling:

$$\nabla \times \mathbf{E} = -j\omega\mu_0 \mathbf{H} \quad (\text{S.5})$$

$$\nabla \times \mathbf{H} = j\omega\epsilon_0 N_p^2 \mathbf{E} \quad (\text{S.6})$$

Now, by replacing (S.3) and (S.4) into (S.5) and (S.6) we will get the equation of (S.7) and (S.8)

$$\frac{dA}{dz} + c_{12} \frac{dB}{dz} \exp[-j(\beta_2 - \beta_1)z] + j\chi_1 A + jk_{12} B \exp[-j(\beta_2 - \beta_1)z] = 0 \quad (\text{S.7})$$

$$\frac{dB}{dz} + c_{21} \frac{dA}{dz} \exp[+j(\beta_2 - \beta_1)z] + j\chi_2 A + jk_{21} A \exp[+j(\beta_2 - \beta_1)z] = 0 \quad (\text{S.8})$$

From those equ. (S.7), (S.8) three important parameter  $K_{pq}$ ,  $C_{pq}$  and  $\chi_p$  are seen. The properties of the directional coupler can be understand from those parameters.

The mode coupling co-efficient,  $K_{pq}$  ( $p,q=1,2$ ) of a directional coupler indicate the possibility of polarization of conversion from the waveguide-I to the waveguide-II. The mode coupling co-efficient,  $K_{pq}$  can be

$$K_{pq} = \frac{\omega\epsilon_0 \int_{-\alpha-\alpha}^{+\alpha+\alpha} \int_{-\alpha-\alpha}^{+\alpha+\alpha} (N^2 - N_2^2) E_1^* \cdot E_2 dx dy}{\int_{-\alpha-\alpha}^{+\alpha+\alpha} \int_{-\alpha-\alpha}^{+\alpha+\alpha} u_z \cdot (E_1^* \times H_1 + E_1 \times H_1^*) dx dy} \quad (\text{S.9})$$

This indicate the overlap of the fields. If field of the waveguide-I is orthogonal to the waveguide-II,  $K_{12} = 0$  means no power coupling between the modes. In the case of small width waveguide,  $K_{12} \neq 0$  means some value of the overlap fields are found due to the absence of pure or 100% TE or TM modes. Modes are known as quasi TE or TM (also say TE like and TM like modes). Therefore, some power exist even in the longitudinal fields. This is only true for small waveguide. Based on this concepts small dimension waveguide are used for the passive polarization devices [1].

Another important parameter butt coupling coefficient,  $C_{12}$  is defined as

$$C_{pq} = \frac{\int_{-\alpha-\alpha}^{+\alpha+\alpha} \int u_z \cdot (E_p^* \times H_q + E_p \times H_p^*) dx dy}{\int_{-\alpha-\alpha}^{+\alpha+\alpha} \int u_z \cdot (E_p^* \times H_p + E_p \times H_p^*) dx dy} \quad (S.10)$$

This indicate the excitation efficiency of waveguide-I due to the field of waveguide-II. This may happen, when the eigen modes ( $E_1 H_1$ ) of waveguide-I is in the cladding region of waveguide-II and it's eigen modes ( $E_2 H_2$ ) make excitation to waveguide-I.

Another, important parameter is  $\chi_p$ , indicate the electric field distribution coupled to the adjacent waveguide. Generally,  $\chi_p$  is  $\eta$  times smaller than  $k_{pq}$  and cannot be neglected when the waveguides are very close to each other. The expression for  $\chi_p$  is

$$\chi_p = \frac{\omega \epsilon_0 \int_{-\alpha-\alpha}^{+\alpha+\alpha} \int (N^2 - N_q^2) E_p^* \cdot E_q dx dy}{\int_{-\alpha-\alpha}^{+\alpha+\alpha} \int u_z \cdot (E_p^* \times H_p + E_p \times H_p^*) dx dy} \quad (S.11)$$

The optical power carried by the waveguide due to the eigen mode is given by

$$P_p = \frac{1}{2} \iint_{-\infty}^{\infty} (E_p \times H_p^*) u_z dx dy \quad (S.12)$$

The difference of propagation constants between the waveguides,  $\delta = (\beta_2 - \beta_1)/2$

For the co-directional coupler  $\beta_1, \beta_2 > 0$  but in the contra-directional coupler  $\beta_1 > 0$  and  $\beta_2 < 0$ .

For the lossless waveguide, the power remain constant. Therefore,  $\frac{\partial P}{\partial z} = 0$ . One important relation between the coupling coefficients and propagation constants differences is

$$k_{21} = k_{12}^* + 2\delta C_{12}^*$$

For the symmetrical waveguide (same dimension), having same mode coupling coefficient ( $k_{12} = k_{21}^*$ ) and butt coupling is zero ( $C_{12} = 0$ ). Therefore, the propagation constant difference of the waveguide is also zero  $\delta = (\beta_2 - \beta_1)/2 = 0$ . Those are also true if the waveguides are separated from

each other at sufficient distances. With asymmetrical waveguide (different WG dimension) all those parameters have non-zero values and cannot be negligible. [1]

## Ring Resonator and Spectral Characteristics

Ring resonator is an important element of optical switch, modulator, filter and sensing applications. A ring resonator consist with the bus waveguide and a loop waveguide. The loop can be different types such as circle, ellipse, triangular or racetrack etc. [2]. Figure S2 shows the simple all pass ring resonator.

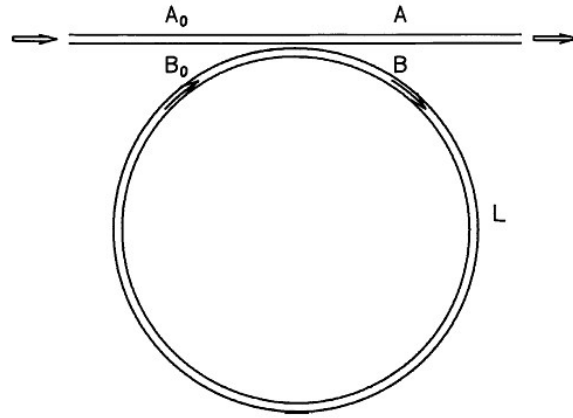

Figure S2: All pass ring resonator

The amplitude transmittance of the ring resonator,

$$\frac{A}{A_0} = (1 - \gamma)^{1/2} \left[ \frac{\cos(kl) - (1 - \gamma)^{1/2} \exp(-\frac{\rho}{2}L - j\beta L)}{1 - (1 - \gamma)^{1/2} \cos(kl) \exp(-\frac{\rho}{2}L - j\beta L)} \right] \quad (\text{S.13})$$

Let us consider,

$$a = (1 - \gamma)^{1/2} \exp(-\frac{\rho}{2}L)$$

$$t = \cos(kl)$$

$$\phi = \beta L$$

Then, Transmission intensity,

$$T(\phi) = \left| \frac{A}{A_0} \right|^2 = (1 - \gamma) \left[ \frac{a^2 - 2at \cos(\phi) + t^2}{1 - 2at \cos(\phi) + (at)^2} \right] \quad (\text{S.14})$$

Here,  $a$  = single round trip amplitude transmission,

$t$  = transmission co-efficient and

$\phi$  = single round trip phase shift

In the lossless case,  $t^2 + a^2 = 1$ . Now, the maximum and minimum transmission are

$$T_{\max} = (1 - \gamma) \frac{(a + t)^2}{(1 + at)^2} \quad (\text{S.15})$$

$$T_{\min} = (1 - \gamma) \frac{(a - t)^2}{(1 - at)^2}$$

The resonance wavelength of the of the resonator is defined as

$$\lambda_{\text{res}} = \frac{n_{\text{eff}} L}{m} \quad m = 1, 2, 3, \dots \quad (\text{S.16})$$

The critical coupling is define as the resonance condition in which the transmission at the output port is zero. That means  $T_{\min}$  drops to zero,  $a = t$  or  $1 - a^2 = k^2$ , which indicate the transmitted power equals to the loss in the ring.

The full width at half maximum (FWHM) is the 3dB resonance width is defined as

$$\text{FWHM} = \frac{(1 - at)\lambda_{\text{res}}^2}{\pi n_g L \sqrt{at}} \quad (\text{S.17})$$

Here,  $n_g$  = group index of waveguide and function of effective index and wavelength is defined as

$$n_g = n_{\text{eff}} - \lambda \frac{dn_{\text{eff}}}{d\lambda} \quad (\text{S.18})$$

The on-off extinction ratio is defined as the ratio of  $T_{\max}$  and  $T_{\min}$ :

$$\text{ER} = \frac{T_{\max}}{T_{\min}} = \frac{(a + t)^2 (1 - at)^2}{(a - t)^2 (1 + at)^2} \quad (\text{S.19})$$

For the critical coupling,  $T_{\min} = 0$ , so ER value is large. For our simulation

$$\text{ER} = \frac{(a + t)^2 (1 - at)^2}{(a - t)^2 (1 + at)^2} = \frac{(0.95 + 0.75)^2 (1 - 0.95 * 0.75)^2}{(0.95 - 0.75)^2 (1 + 0.95 * 0.75)^2} = 2.036349832$$

The wavelength range between two resonances is known as free spectral range (FSR):

$$FSR = \frac{\lambda^2}{n_g L} \quad (S.20)$$

For 486x220 nm<sup>2</sup> SOI waveguide group index is found  $n_g \approx 4.55$ .

The finesse is defined as the ratio of FSR and resonance width:

$$Finesse = \frac{FSR}{FWHM} \quad (S.21)$$

The finesse indicates the sharpness of the resonance relative to their spacing. The Q-factor is measured as the sharpness relative to the central frequency:

$$Q\text{-factor} = \frac{\lambda_{res}}{FWHM} \quad (S.22)$$

It can be also defined as

$$Q\text{-factor} = \frac{\pi n_g L \sqrt{at}}{\lambda_{res} (1 - at)} \quad (S.23)$$

The physical meaning of the Q-factor indicates the number of roundtrips by the light through the ring waveguide before it loses to initial values. More specifically, at Q-value energy lost 1/e of the initial energy. To define the Q-factor, ring is excited to some energy level and consider the loss of energy with time. Therefore, to make high Q-factor reduction of loss due to coupler is important. This section is an adaption of [1, 3].

## References

1. Katsunari Okamoto, Fundamentals of Optical Waveguides, Second Edition, chapter 2, 4, Elsevier, 2006.
2. Rohit Grover, "Indium Phosphide Based Optical Micro Ring resonators" PhD thesis, pages:1-50, Graduate School of the University of Maryland, College Park, 2003.
3. Katrien De Vos, Label-free Silicon Photonics Biosensor Platform with Microring Resonators, PhD thesis, Grant University, 2010.
